# Supplementary material
Source: publisher site journal article supplement (https://www.dovepress.com/get_supplementary_file.php?f=248997.xlsx)
Supplement: Supplementary file 1 [file get_supplementary_file.php]

## Sheet: Supplementary Table 1
Gene sets are upregulated in phenotype L															NAME	GS<br> follow link to MSigDB	GS DETAILS	SIZE	ES	NES	NOM p-val	FDR q-val	FWER p-val	RANK AT MAX	LEADING EDGE
NAME	GS<br> follow link to MSigDB	GS DETAILS	SIZE	ES	NES	NOM p-val	FDR q-val	FWER p-val	RANK AT MAX	LEADING EDGE					HALLMARK_DNA_REPAIR	HALLMARK_DNA_REPAIR	Details ...	147	0.53774	2.12595	0.00198807	0.0118023	0.019	5945	tags=54%, list=22%, signal=70%
HALLMARK_DNA_REPAIR	HALLMARK_DNA_REPAIR	Details ...	147	0.53774	2.12595	0.00198807	0.0118023	0.019	5945	tags=54%, list=22%, signal=70%					HALLMARK_MYC_TARGETS_V1	HALLMARK_MYC_TARGETS_V1	Details ...	196	0.672013	2.00557	0.00784314	0.0221402	0.052	6969	tags=79%, list=26%, signal=106%
HALLMARK_MYC_TARGETS_V1	HALLMARK_MYC_TARGETS_V1	Details ...	196	0.672013	2.00557	0.00784314	0.0221402	0.052	6969	tags=79%, list=26%, signal=106%					HALLMARK_MYC_TARGETS_V2	HALLMARK_MYC_TARGETS_V2	Details ...	56	0.778624	1.97894	0.00199601	0.0181662	0.063	4245	tags=82%, list=16%, signal=98%
HALLMARK_MYC_TARGETS_V2	HALLMARK_MYC_TARGETS_V2	Details ...	56	0.778624	1.97894	0.00199601	0.0181662	0.063	4245	tags=82%, list=16%, signal=98%					HALLMARK_UNFOLDED_PROTEIN_RESPONSE	HALLMARK_UNFOLDED_PROTEIN_RESPONSE	Details ...	113	0.47581	1.94983	0.00612245	0.0160835	0.074	5892	tags=43%, list=22%, signal=55%
HALLMARK_UNFOLDED_PROTEIN_RESPONSE	HALLMARK_UNFOLDED_PROTEIN_RESPONSE	Details ...	113	0.47581	1.94983	0.00612245	0.0160835	0.074	5892	tags=43%, list=22%, signal=55%					HALLMARK_E2F_TARGETS	HALLMARK_E2F_TARGETS	Details ...	198	0.740788	1.91729	0.00195312	0.0192961	0.1	4213	tags=68%, list=16%, signal=80%
HALLMARK_E2F_TARGETS	HALLMARK_E2F_TARGETS	Details ...	198	0.740788	1.91729	0.00195312	0.0192961	0.1	4213	tags=68%, list=16%, signal=80%					HALLMARK_G2M_CHECKPOINT	HALLMARK_G2M_CHECKPOINT	Details ...	199	0.667962	1.87238	0.00199203	0.0241105	0.137	3594	tags=53%, list=14%, signal=61%
HALLMARK_G2M_CHECKPOINT	HALLMARK_G2M_CHECKPOINT	Details ...	199	0.667962	1.87238	0.00199203	0.0241105	0.137	3594	tags=53%, list=14%, signal=61%					HALLMARK_MTORC1_SIGNALING	HALLMARK_MTORC1_SIGNALING	Details ...	199	0.517237	1.85052	0.00604839	0.0246776	0.157	4931	tags=47%, list=19%, signal=58%
HALLMARK_MTORC1_SIGNALING	HALLMARK_MTORC1_SIGNALING	Details ...	199	0.517237	1.85052	0.00604839	0.0246776	0.157	4931	tags=47%, list=19%, signal=58%					HALLMARK_GLYCOLYSIS	HALLMARK_GLYCOLYSIS	Details ...	200	0.404443	1.62668	0.0311891	0.0943924	0.41	6932	tags=47%, list=26%, signal=63%
HALLMARK_GLYCOLYSIS	HALLMARK_GLYCOLYSIS	Details ...	200	0.404443	1.62668	0.0311891	0.0943924	0.41	6932	tags=47%, list=26%, signal=63%					HALLMARK_UV_RESPONSE_UP	HALLMARK_UV_RESPONSE_UP	Details ...	158	0.333115	1.48726	0.0668016	0.171183	0.609	4995	tags=37%, list=19%, signal=46%
HALLMARK_UV_RESPONSE_UP	HALLMARK_UV_RESPONSE_UP	Details ...	158	0.333115	1.48726	0.0668016	0.171183	0.609	4995	tags=37%, list=19%, signal=46%					HALLMARK_OXIDATIVE_PHOSPHORYLATION	HALLMARK_OXIDATIVE_PHOSPHORYLATION	Details ...	196	0.414469	1.44332	0.214286	0.187013	0.667	8761	tags=62%, list=33%, signal=92%
HALLMARK_OXIDATIVE_PHOSPHORYLATION	HALLMARK_OXIDATIVE_PHOSPHORYLATION	Details ...	196	0.414469	1.44332	0.214286	0.187013	0.667	8761	tags=62%, list=33%, signal=92%					HALLMARK_CHOLESTEROL_HOMEOSTASIS	HALLMARK_CHOLESTEROL_HOMEOSTASIS	Details ...	72	0.43006	1.43839	0.123552	0.173671	0.672	4608	tags=40%, list=17%, signal=49%
HALLMARK_CHOLESTEROL_HOMEOSTASIS	HALLMARK_CHOLESTEROL_HOMEOSTASIS	Details ...	72	0.43006	1.43839	0.123552	0.173671	0.672	4608	tags=40%, list=17%, signal=49%					HALLMARK_SPERMATOGENESIS	HALLMARK_SPERMATOGENESIS	Details ...	133	0.391419	1.42713	0.0538922	0.166637	0.691	2818	tags=23%, list=11%, signal=26%
HALLMARK_SPERMATOGENESIS	HALLMARK_SPERMATOGENESIS	Details ...	133	0.391419	1.42713	0.0538922	0.166637	0.691	2818	tags=23%, list=11%, signal=26%					HALLMARK_MITOTIC_SPINDLE	HALLMARK_MITOTIC_SPINDLE	Details ...	199	0.36724	1.35984	0.181118	0.198472	0.768	3552	tags=27%, list=13%, signal=31%
HALLMARK_MITOTIC_SPINDLE	HALLMARK_MITOTIC_SPINDLE	Details ...	199	0.36724	1.35984	0.181118	0.198472	0.768	3552	tags=27%, list=13%, signal=31%					HALLMARK_REACTIVE_OXIGEN_SPECIES_PATHWAY	HALLMARK_REACTIVE_OXIGEN_SPECIES_PATHWAY	Details ...	48	0.309374	1.14885	0.333333	0.375025	0.933	7318	tags=44%, list=28%, signal=60%
HALLMARK_REACTIVE_OXIGEN_SPECIES_PATHWAY	HALLMARK_REACTIVE_OXIGEN_SPECIES_PATHWAY	Details ...	48	0.309374	1.14885	0.333333	0.375025	0.933	7318	tags=44%, list=28%, signal=60%					HALLMARK_PI3K_AKT_MTOR_SIGNALING	HALLMARK_PI3K_AKT_MTOR_SIGNALING	Details ...	105	0.207789	1.03508	0.393064	0.481263	0.97	4668	tags=22%, list=18%, signal=26%
HALLMARK_PI3K_AKT_MTOR_SIGNALING	HALLMARK_PI3K_AKT_MTOR_SIGNALING	Details ...	105	0.207789	1.03508	0.393064	0.481263	0.97	4668	tags=22%, list=18%, signal=26%					HALLMARK_ESTROGEN_RESPONSE_LATE	HALLMARK_ESTROGEN_RESPONSE_LATE	Details ...	199	0.259632	1.02381	0.412602	0.463894	0.971	3765	tags=26%, list=14%, signal=30%
HALLMARK_ESTROGEN_RESPONSE_LATE	HALLMARK_ESTROGEN_RESPONSE_LATE	Details ...	199	0.259632	1.02381	0.412602	0.463894	0.971	3765	tags=26%, list=14%, signal=30%					HALLMARK_WNT_BETA_CATENIN_SIGNALING	HALLMARK_WNT_BETA_CATENIN_SIGNALING	Details ...	42	0.310549	0.971882	0.492278	0.498075	0.979	3666	tags=26%, list=14%, signal=30%
HALLMARK_WNT_BETA_CATENIN_SIGNALING	HALLMARK_WNT_BETA_CATENIN_SIGNALING	Details ...	42	0.310549	0.971882	0.492278	0.498075	0.979	3666	tags=26%, list=14%, signal=30%					HALLMARK_P53_PATHWAY	HALLMARK_P53_PATHWAY	Details ...	199	0.224419	0.906423	0.549296	0.547423	0.991	3902	tags=22%, list=15%, signal=26%
HALLMARK_P53_PATHWAY	HALLMARK_P53_PATHWAY	Details ...	199	0.224419	0.906423	0.549296	0.547423	0.991	3902	tags=22%, list=15%, signal=26%					HALLMARK_INTERFERON_ALPHA_RESPONSE	HALLMARK_INTERFERON_ALPHA_RESPONSE	Details ...	97	0.182952	0.479864	0.881657	0.960879	1	5125	tags=24%, list=19%, signal=29%
HALLMARK_INTERFERON_ALPHA_RESPONSE	HALLMARK_INTERFERON_ALPHA_RESPONSE	Details ...	97	0.182952	0.479864	0.881657	0.960879	1	5125	tags=24%, list=19%, signal=29%
